# Supplementary material for: Diversity and Resistance to Thiophanate-Methyl of Colletotrichum spp. in Strawberry Nursery and the Development of Rapid Detection Using LAMP Method
Source: MDPI journal article supplement (doi:10.3390/agronomy12112815), 2022-11-11
Supplement: s1 [file s1]

# Diversity, Resistance to Thiophanate-methyl of *Colletotrichum* Spp. in Strawberry Nursery and the Development of Rapid Detection Using LAMP Method

Jianyan Wu <sup>1,3#</sup>, Shuodan Hu <sup>1#</sup>, Boyang Ye <sup>1</sup>, Xiaoran Hu <sup>1</sup>, Wenfei Xiao <sup>2</sup>, Hong Yu <sup>2,\*</sup>, Chuanqing Zhang <sup>1,\*</sup>

<sup>1</sup> College of Advanced Agricultural Sciences, Zhejiang A&F university, Hangzhou 311300, China  
<sup>2</sup> Zhejiang Xinnong Chemical Co., Ltd., Hangzhou 310023, China  
<sup>3</sup> Research Institute for the Agriculture Science of Hangzhou, Hangzhou 310013, China  
\* Correspondence: yhtlj12345@126.com (H.Y.); cqzhang@zafu.edu.cn (C.Z.)  
† These authors have contributed equally to this work.

Table S1 *Colletotrichum* spp. used in multi-gene analysis in this study.

| Species              | Sample number | Isolates    | Host                                         | Country                  | GenBank no. |          |          |          |          |
|----------------------|---------------|-------------|----------------------------------------------|--------------------------|-------------|----------|----------|----------|----------|
|                      |               |             |                                              |                          | ITS         | ACT      | CAL      | CHS-1    | GAPDH    |
| <i>C. aenigma</i>    | /             | ICMP 18686* | <i>Pyrus pyrifolia</i>                       | Japan                    | JX010243    | JX009519 | JX009684 | JX009789 | JX009913 |
|                      | ZJNS-72       | ZJLA-W062   | <i>Fragaria</i> × <i>ananassa</i>            | Nursery, Zhejiang, China | OP602727    | OP610857 | OP610862 | OP610867 | OP610872 |
|                      | ZJNS-78       | ZJLA-W066   | <i>Fragaria</i> × <i>ananassa</i>            | Nursery, Zhejiang, China | OP602728    | OP610858 | OP610863 | OP610868 | OP610873 |
|                      | ZJNS-80       | ZJLA-W068   | <i>Fragaria</i> × <i>ananassa</i>            | Nursery, Zhejiang, China | OP602729    | OP610859 | OP610864 | OP610869 | OP610874 |
|                      | ZJNS-105      | ZJLA-W092   | <i>Fragaria</i> × <i>ananassa</i>            | Nursery, Zhejiang, China | OP617678    | OP642040 | OP642042 | OP642044 | OP642046 |
|                      | ZJNS-110      | ZJLA-W097   | <i>Fragaria</i> × <i>ananassa</i>            | Nursery, Zhejiang, China | OP617679    | OP642041 | OP642043 | OP642045 | OP642047 |
| <i>C. boninense</i>  | /             | CBS 123755* | <i>Crinum asiaticum</i> var. <i>sini-cum</i> | Japan                    | JX010292    | JX009583 | JQ005674 | JX009827 | JX009905 |
| <i>C. fructicola</i> | /             | ICMP 18581* | <i>Coffea arabica</i>                        | Thailand                 | JX010165    | FJ907426 | FJ917508 | JX009866 | JX010033 |
|                      | ZJNS-3        | ZJLA-W002   | <i>Fragaria</i> × <i>ananassa</i>            | Nursery, Zhejiang, China | OP602732    | OP610709 | OP610746 | OP610783 | OP610820 |
|                      | ZJNS-11       | ZJLA-W009   | <i>Fragaria</i> × <i>ananassa</i>            | Nursery, Zhejiang, China | OP602733    | OP610710 | OP610747 | OP610784 | OP610821 |
|                      | ZJNS-13       | ZJLA-W010   | <i>Fragaria</i> × <i>ananassa</i>            | Nursery, Zhejiang, China | OP602734    | OP610711 | OP610748 | OP610785 | OP610822 |
|                      | ZJNS-14       | ZJLA-W011   | <i>Fragaria</i> × <i>ananassa</i>            | Nursery, Zhejiang, China | OP602735    | OP610712 | OP610749 | OP610786 | OP610823 |

---

|         |           |                                   |                          |          |          |          |          |          |
|---------|-----------|-----------------------------------|--------------------------|----------|----------|----------|----------|----------|
| ZJNS-18 | ZJLA-W013 | <i>Fragaria</i> × <i>ananassa</i> | Nursery, Zhejiang, China | OP602736 | OP610713 | OP610750 | OP610787 | OP610824 |
| ZJNS-19 | ZJLA-W014 | <i>Fragaria</i> × <i>ananassa</i> | Nursery, Zhejiang, China | OP602737 | OP610714 | OP610751 | OP610788 | OP610825 |
| ZJNS-20 | ZJLA-W015 | <i>Fragaria</i> × <i>ananassa</i> | Nursery, Zhejiang, China | OP602738 | OP610715 | OP610752 | OP610789 | OP610826 |
| ZJNS-22 | ZJLA-W017 | <i>Fragaria</i> × <i>ananassa</i> | Nursery, Zhejiang, China | OP602739 | OP610716 | OP610753 | OP610790 | OP610827 |
| ZJNS-23 | ZJLA-W018 | <i>Fragaria</i> × <i>ananassa</i> | Nursery, Zhejiang, China | OP602740 | OP610717 | OP610754 | OP610791 | OP610828 |
| ZJNS-24 | ZJLA-W019 | <i>Fragaria</i> × <i>ananassa</i> | Nursery, Zhejiang, China | OP602741 | OP610718 | OP610755 | OP610792 | OP610829 |
| ZJNS-25 | ZJLA-W020 | <i>Fragaria</i> × <i>ananassa</i> | Nursery, Zhejiang, China | OP602742 | OP610719 | OP610756 | OP610793 | OP610830 |
| ZJNS-26 | ZJLA-W021 | <i>Fragaria</i> × <i>ananassa</i> | Nursery, Zhejiang, China | OP602743 | OP610720 | OP610757 | OP610794 | OP610831 |
| ZJNS-27 | ZJLA-W022 | <i>Fragaria</i> × <i>ananassa</i> | Nursery, Zhejiang, China | OP602744 | OP610721 | OP610758 | OP610795 | OP610832 |
| ZJNS-28 | ZJLA-W023 | <i>Fragaria</i> × <i>ananassa</i> | Nursery, Zhejiang, China | OP602745 | OP610722 | OP610759 | OP610796 | OP610833 |
| ZJNS-29 | ZJLA-W024 | <i>Fragaria</i> × <i>ananassa</i> | Nursery, Zhejiang, China | OP602746 | OP610723 | OP610760 | OP610797 | OP610834 |
| ZJNS-30 | ZJLA-W025 | <i>Fragaria</i> × <i>ananassa</i> | Nursery, Zhejiang, China | OP602747 | OP610724 | OP610761 | OP610798 | OP610835 |
| ZJNS-34 | ZJLA-W028 | <i>Fragaria</i> × <i>ananassa</i> | Nursery, Zhejiang, China | OP602748 | OP610725 | OP610762 | OP610799 | OP610836 |
| ZJNS-35 | ZJLA-W029 | <i>Fragaria</i> × <i>ananassa</i> | Nursery, Zhejiang, China | OP602749 | OP610726 | OP610763 | OP610800 | OP610837 |
| ZJNS-36 | ZJLA-W030 | <i>Fragaria</i> × <i>ananassa</i> | Nursery, Zhejiang, China | OP602750 | OP610727 | OP610764 | OP610801 | OP610838 |
| ZJNS-38 | ZJLA-W032 | <i>Fragaria</i> × <i>ananassa</i> | Nursery, Zhejiang, China | OP602751 | OP610728 | OP610765 | OP610802 | OP610839 |
| ZJNS-53 | ZJLA-W046 | <i>Fragaria</i> × <i>ananassa</i> | Nursery, Zhejiang, China | OP602752 | OP610729 | OP610766 | OP610803 | OP610840 |
| ZJNS-54 | ZJLA-W047 | <i>Fragaria</i> × <i>ananassa</i> | Nursery, Zhejiang, China | OP602753 | OP610730 | OP610767 | OP610804 | OP610841 |
| ZJNS-55 | ZJLA-W048 | <i>Fragaria</i> × <i>ananassa</i> | Nursery, Zhejiang, China | OP602754 | OP610731 | OP610768 | OP610805 | OP610842 |
| ZJNS-56 | ZJLA-W049 | <i>Fragaria</i> × <i>ananassa</i> | Nursery, Zhejiang, China | OP602755 | OP610732 | OP610769 | OP610806 | OP610843 |
| ZJNS-59 | ZJLA-W051 | <i>Fragaria</i> × <i>ananassa</i> | Nursery, Zhejiang, China | OP602756 | OP610733 | OP610770 | OP610807 | OP610844 |
| ZJNS-61 | ZJLA-W052 | <i>Fragaria</i> × <i>ananassa</i> | Nursery, Zhejiang, China | OP602757 | OP610734 | OP610771 | OP610808 | OP610845 |
| ZJNS-62 | ZJLA-W053 | <i>Fragaria</i> × <i>ananassa</i> | Nursery, Zhejiang, China | OP602758 | OP610735 | OP610772 | OP610809 | OP610846 |
| ZJNS-73 | ZJLA-W063 | <i>Fragaria</i> × <i>ananassa</i> | Nursery, Zhejiang, China | OP602759 | OP610736 | OP610773 | OP610810 | OP610847 |
| ZJNS-74 | ZJLA-W064 | <i>Fragaria</i> × <i>ananassa</i> | Nursery, Zhejiang, China | OP602760 | OP610737 | OP610774 | OP610811 | OP610848 |
| ZJNS-76 | ZJLA-W065 | <i>Fragaria</i> × <i>ananassa</i> | Nursery, Zhejiang, China | OP602761 | OP610738 | OP610775 | OP610812 | OP610849 |

---

|                           |          |             |                                   |                          |          |          |          |          |          |
|---------------------------|----------|-------------|-----------------------------------|--------------------------|----------|----------|----------|----------|----------|
| <i>C. gloeosporioides</i> | ZJNS-79  | ZJLA-W067   | <i>Fragaria</i> × <i>ananassa</i> | Nursery, Zhejiang, China | OP602762 | OP610739 | OP610776 | OP610813 | OP610850 |
|                           | ZJNS-90  | ZJLA-W078   | <i>Fragaria</i> × <i>ananassa</i> | Nursery, Zhejiang, China | OP602763 | OP610740 | OP610777 | OP610814 | OP610851 |
|                           | ZJNS-91  | ZJLA-W079   | <i>Fragaria</i> × <i>ananassa</i> | Nursery, Zhejiang, China | OP602764 | OP610741 | OP610778 | OP610815 | OP610852 |
|                           | ZJNS-92  | ZJLA-W080   | <i>Fragaria</i> × <i>ananassa</i> | Nursery, Zhejiang, China | OP602765 | OP610742 | OP610779 | OP610516 | OP610853 |
|                           | ZJNS-100 | ZJLA-W088   | <i>Fragaria</i> × <i>ananassa</i> | Nursery, Zhejiang, China | OP602766 | OP610743 | OP610780 | OP610817 | OP610854 |
|                           | ZJNS-101 | ZJLA-W089   | <i>Fragaria</i> × <i>ananassa</i> | Nursery, Zhejiang, China | OP602767 | OP610744 | OP610781 | OP610818 | OP610855 |
|                           | ZJNS-103 | ZJLA-W090   | <i>Fragaria</i> × <i>ananassa</i> | Nursery, Zhejiang, China | OP602768 | OP610745 | OP610782 | OP610819 | OP610856 |
|                           | /        | IMI 356878* | <i>Citrus sinensis</i>            | Italy                    | JX010152 | JX009531 | JX009731 | JX009818 | JX010056 |
|                           | ZJNS-2   | ZJLA-W001   | <i>Fragaria</i> × <i>ananassa</i> | Nursery, Zhejiang, China | OP602945 | OP611101 | OP611108 | OP611115 | OP611122 |
|                           | ZJNS-4   | ZJLA-W003   | <i>Fragaria</i> × <i>ananassa</i> | Nursery, Zhejiang, China | OP602946 | OP611102 | OP611109 | OP611116 | OP611123 |
|                           | ZJNS-7   | ZJLA-W006   | <i>Fragaria</i> × <i>ananassa</i> | Nursery, Zhejiang, China | OP602947 | OP611103 | OP611110 | OP611117 | OP611124 |
|                           | ZJNS-21  | ZJLA-W016   | <i>Fragaria</i> × <i>ananassa</i> | Nursery, Zhejiang, China | OP602948 | OP611104 | OP611111 | OP611118 | OP611125 |
|                           | ZJNS-37  | ZJLA-W031   | <i>Fragaria</i> × <i>ananassa</i> | Nursery, Zhejiang, China | OP602949 | OP611105 | OP611112 | OP611119 | OP611126 |
|                           | ZJNS-45  | ZJLA-W039   | <i>Fragaria</i> × <i>ananassa</i> | Nursery, Zhejiang, China | OP602950 | OP611106 | OP611113 | OP611120 | OP611127 |
|                           | ZJNS-47  | ZJLA-W041   | <i>Fragaria</i> × <i>ananassa</i> | Nursery, Zhejiang, China | OP602951 | OP611107 | OP611114 | OP611121 | OP611128 |
| <i>C. salsolae</i>        | /        | ICMP 19051* | <i>Salsola tragus</i>             | Hungary                  | JX010242 | JX009562 | JX009696 | JX009863 | JX009916 |
|                           | /        | ICMP 17785* | <i>Malus domestica</i>            | USA                      | JX010272 | JX009446 | JX009706 | JX009804 | JX010051 |
|                           | /        | ICMP 18572* | <i>Vitis vinifera</i>             | USA                      | JX010160 | JX009487 | JX009705 | JX009783 | JX010061 |
| <i>C. siamense</i>        | ZJNS-5   | ZJLA-W004   | <i>Fragaria</i> × <i>ananassa</i> | Nursery, Zhejiang, China | OP602769 | OP610933 | OP610877 | OP610988 | OP611045 |
|                           | ZJNS-6   | ZJLA-W005   | <i>Fragaria</i> × <i>ananassa</i> | Nursery, Zhejiang, China | OP602770 | OP610934 | OP610878 | OP610989 | OP611046 |
|                           | ZJNS-8   | ZJLA-W007   | <i>Fragaria</i> × <i>ananassa</i> | Nursery, Zhejiang, China | OP602771 | OP610935 | OP610879 | OP610991 | OP611047 |
|                           | ZJNS-9   | ZJLA-W008   | <i>Fragaria</i> × <i>ananassa</i> | Nursery, Zhejiang, China | OP602772 | OP610936 | OP610880 | OP610992 | OP611048 |
|                           | ZJNS-16  | ZJLA-W012   | <i>Fragaria</i> × <i>ananassa</i> | Nursery, Zhejiang, China | OP602773 | OP610937 | OP610881 | OP610993 | OP611049 |
|                           | ZJNS-31  | ZJLA-W026   | <i>Fragaria</i> × <i>ananassa</i> | Nursery, Zhejiang, China | OP602774 | OP610938 | OP610882 | OP610994 | OP611050 |
|                           | ZJNS-32  | ZJLA-W027   | <i>Fragaria</i> × <i>ananassa</i> | Nursery, Zhejiang, China | OP602775 | OP610939 | OP610883 | OP610995 | OP611051 |
|                           | ZJNS-39  | ZJLA-W033   | <i>Fragaria</i> × <i>ananassa</i> | Nursery, Zhejiang, China | OP602776 | OP610940 | OP610084 | OP610996 | OP611052 |

---

|         |           |                                   |                          |          |          |          |          |          |
|---------|-----------|-----------------------------------|--------------------------|----------|----------|----------|----------|----------|
| ZJNS-40 | ZJLA-W034 | <i>Fragaria</i> × <i>ananassa</i> | Nursery, Zhejiang, China | OP602777 | OP610941 | OP610885 | OP610997 | OP611053 |
| ZJNS-41 | ZJLA-W035 | <i>Fragaria</i> × <i>ananassa</i> | Nursery, Zhejiang, China | OP602778 | OP610942 | OP610886 | OP610998 | OP611054 |
| ZJNS-42 | ZJLA-W036 | <i>Fragaria</i> × <i>ananassa</i> | Nursery, Zhejiang, China | OP602779 | OP610943 | OP610887 | OP610999 | OP611055 |
| ZJNS-43 | ZJLA-W037 | <i>Fragaria</i> × <i>ananassa</i> | Nursery, Zhejiang, China | OP602780 | OP610944 | OP610888 | OP611000 | OP611056 |
| ZJNS-44 | ZJLA-W038 | <i>Fragaria</i> × <i>ananassa</i> | Nursery, Zhejiang, China | OP602781 | OP610945 | OP610889 | OP611001 | OP611057 |
| ZJNS-46 | ZJLA-W040 | <i>Fragaria</i> × <i>ananassa</i> | Nursery, Zhejiang, China | OP602782 | OP610946 | OP610890 | OP611002 | OP611058 |
| ZJNS-49 | ZJLA-W042 | <i>Fragaria</i> × <i>ananassa</i> | Nursery, Zhejiang, China | OP602783 | OP610947 | OP610891 | OP611003 | OP611059 |
| ZJNS-50 | ZJLA-W043 | <i>Fragaria</i> × <i>ananassa</i> | Nursery, Zhejiang, China | OP602784 | OP610948 | OP610892 | OP611004 | OP611060 |
| ZJNS-51 | ZJLA-W044 | <i>Fragaria</i> × <i>ananassa</i> | Nursery, Zhejiang, China | OP602785 | OP610949 | OP610893 | OP611005 | OP611061 |
| ZJNS-52 | ZJLA-W045 | <i>Fragaria</i> × <i>ananassa</i> | Nursery, Zhejiang, China | OP602786 | OP610950 | OP610894 | OP611006 | OP611062 |
| ZJNS-57 | ZJLA-W050 | <i>Fragaria</i> × <i>ananassa</i> | Nursery, Zhejiang, China | OP602787 | OP610951 | OP610895 | OP611007 | OP611063 |
| ZJNS-63 | ZJLA-W054 | <i>Fragaria</i> × <i>ananassa</i> | Nursery, Zhejiang, China | OP602788 | OP610952 | OP610896 | OP611008 | OP611064 |
| ZJNS-64 | ZJLA-W055 | <i>Fragaria</i> × <i>ananassa</i> | Nursery, Zhejiang, China | OP602789 | OP610953 | OP610897 | OP611009 | OP611065 |
| ZJNS-65 | ZJLA-W056 | <i>Fragaria</i> × <i>ananassa</i> | Nursery, Zhejiang, China | OP602790 | OP610954 | OP610898 | OP611010 | OP611066 |
| ZJNS-66 | ZJLA-W057 | <i>Fragaria</i> × <i>ananassa</i> | Nursery, Zhejiang, China | OP602791 | OP610955 | OP610899 | OP611011 | OP611067 |
| ZJNS-67 | ZJLA-W058 | <i>Fragaria</i> × <i>ananassa</i> | Nursery, Zhejiang, China | OP602792 | OP610956 | OP610900 | OP611012 | OP611068 |
| ZJNS-68 | ZJLA-W059 | <i>Fragaria</i> × <i>ananassa</i> | Nursery, Zhejiang, China | OP602793 | OP610957 | OP610901 | OP611013 | OP611069 |
| ZJNS-69 | ZJLA-W060 | <i>Fragaria</i> × <i>ananassa</i> | Nursery, Zhejiang, China | OP602794 | OP610958 | OP610902 | OP611014 | OP611070 |
| ZJNS-70 | ZJLA-W061 | <i>Fragaria</i> × <i>ananassa</i> | Nursery, Zhejiang, China | OP622281 | OP642039 | OP642048 | OP642049 | OP642050 |
| ZJNS-81 | ZJLA-W069 | <i>Fragaria</i> × <i>ananassa</i> | Nursery, Zhejiang, China | OP602796 | OP610960 | OP610904 | OP611016 | OP611072 |
| ZJNS-82 | ZJLA-W070 | <i>Fragaria</i> × <i>ananassa</i> | Nursery, Zhejiang, China | OP602797 | OP610961 | OP610905 | OP611017 | OP611073 |
| ZJNS-83 | ZJLA-W071 | <i>Fragaria</i> × <i>ananassa</i> | Nursery, Zhejiang, China | OP602798 | OP610962 | OP610906 | OP611018 | OP611074 |
| ZJNS-84 | ZJLA-W072 | <i>Fragaria</i> × <i>ananassa</i> | Nursery, Zhejiang, China | OP602799 | OP610963 | OP610907 | OP611019 | OP611075 |
| ZJNS-85 | ZJLA-W073 | <i>Fragaria</i> × <i>ananassa</i> | Nursery, Zhejiang, China | OP602800 | OP610964 | OP610908 | OP611020 | OP611076 |
| ZJNS-86 | ZJLA-W074 | <i>Fragaria</i> × <i>ananassa</i> | Nursery, Zhejiang, China | OP602801 | OP610965 | OP610909 | OP611021 | OP611077 |
| ZJNS-87 | ZJLA-W075 | <i>Fragaria</i> × <i>ananassa</i> | Nursery, Zhejiang, China | OP602802 | OP610966 | OP610910 | OP611022 | OP611078 |

---

|                         |          |             |                                   |                          |          |          |          |          |          |
|-------------------------|----------|-------------|-----------------------------------|--------------------------|----------|----------|----------|----------|----------|
|                         | ZJNS-88  | ZJLA-W076   | <i>Fragaria</i> × <i>ananassa</i> | Nursery, Zhejiang, China | OP602803 | OP610967 | OP610911 | OP611023 | OP611079 |
|                         | ZJNS-89  | ZJLA-W077   | <i>Fragaria</i> × <i>ananassa</i> | Nursery, Zhejiang, China | OP602804 | OP610968 | OP610912 | OP611024 | OP611080 |
|                         | ZJNS-93  | ZJLA-W081   | <i>Fragaria</i> × <i>ananassa</i> | Nursery, Zhejiang, China | OP602805 | OP610969 | OP610913 | OP611025 | OP611081 |
|                         | ZJNS-94  | ZJLA-W082   | <i>Fragaria</i> × <i>ananassa</i> | Nursery, Zhejiang, China | OP602806 | OP610970 | OP610914 | OP611026 | OP611082 |
|                         | ZJNS-95  | ZJLA-W083   | <i>Fragaria</i> × <i>ananassa</i> | Nursery, Zhejiang, China | OP602807 | OP610971 | OP610915 | OP611027 | OP611083 |
|                         | ZJNS-96  | ZJLA-W084   | <i>Fragaria</i> × <i>ananassa</i> | Nursery, Zhejiang, China | OP602808 | OP610972 | OP610916 | OP611028 | OP611084 |
|                         | ZJNS-97  | ZJLA-W085   | <i>Fragaria</i> × <i>ananassa</i> | Nursery, Zhejiang, China | OP602809 | OP610973 | OP610917 | OP611029 | OP611085 |
|                         | ZJNS-98  | ZJLA-W086   | <i>Fragaria</i> × <i>ananassa</i> | Nursery, Zhejiang, China | OP602810 | OP610974 | OP610918 | OP611030 | OP611086 |
|                         | ZJNS-99  | ZJLA-W087   | <i>Fragaria</i> × <i>ananassa</i> | Nursery, Zhejiang, China | OP602811 | OP610975 | OP610919 | OP611031 | OP611087 |
|                         | ZJNS-104 | ZJLA-W091   | <i>Fragaria</i> × <i>ananassa</i> | Nursery, Zhejiang, China | OP602812 | OP610976 | OP610920 | OP611032 | OP611088 |
|                         | ZJNS-106 | ZJLA-W093   | <i>Fragaria</i> × <i>ananassa</i> | Nursery, Zhejiang, China | OP602813 | OP610977 | OP610921 | OP611033 | OP611089 |
|                         | ZJNS-107 | ZJLA-W094   | <i>Fragaria</i> × <i>ananassa</i> | Nursery, Zhejiang, China | OP602814 | OP610978 | OP610922 | OP611034 | OP611090 |
|                         | ZJNS-108 | ZJLA-W095   | <i>Fragaria</i> × <i>ananassa</i> | Nursery, Zhejiang, China | OP602815 | OP610979 | OP610923 | OP611035 | OP611091 |
|                         | ZJNS-109 | ZJLA-W096   | <i>Fragaria</i> × <i>ananassa</i> | Nursery, Zhejiang, China | OP602816 | OP610980 | OP610924 | OP611036 | OP611092 |
|                         | ZJNS-111 | ZJLA-W098   | <i>Fragaria</i> × <i>ananassa</i> | Nursery, Zhejiang, China | OP602817 | OP610981 | OP610925 | OP611037 | OP611093 |
|                         | ZJNS-112 | ZJLA-W099   | <i>Fragaria</i> × <i>ananassa</i> | Nursery, Zhejiang, China | OP602818 | OP610982 | OP610926 | OP611038 | OP611094 |
|                         | ZJNS-113 | ZJLA-W100   | <i>Fragaria</i> × <i>ananassa</i> | Nursery, Zhejiang, China | OP602819 | OP610983 | OP610927 | OP611039 | OP611095 |
|                         | ZJNS-114 | ZJLA-W101   | <i>Fragaria</i> × <i>ananassa</i> | Nursery, Zhejiang, China | OP602820 | OP610984 | OP610928 | OP611040 | OP611096 |
|                         | ZJNS-115 | ZJLA-W102   | <i>Fragaria</i> × <i>ananassa</i> | Nursery, Zhejiang, China | OP602821 | OP610985 | OP610929 | OP611041 | OP611097 |
|                         | ZJNS-116 | ZJLA-W103   | <i>Fragaria</i> × <i>ananassa</i> | Nursery, Zhejiang, China | OP602822 | OP610986 | OP610930 | OP611042 | OP611098 |
|                         | ZJNS-117 | ZJLA-W104   | <i>Fragaria</i> × <i>ananassa</i> | Nursery, Zhejiang, China | OP602823 | OP610987 | OP610931 | OP611043 | OP611099 |
|                         | ZJNS-120 | ZJLA-W105   | <i>Fragaria</i> × <i>ananassa</i> | Nursery, Zhejiang, China | OP602824 | OP610988 | OP610932 | OP611044 | OP611100 |
| <i>C. theobromicola</i> | /        | ICMP 18649* | <i>Theobroma cacao</i>            | Panama                   | JX010294 | JX009444 | JX009591 | JX009869 | JX010006 |
| <i>C. tropicale</i>     | /        | ICMP 18653* | <i>Theobroma cacao</i>            | Panama                   | JX010264 | JX009489 | JX009719 | JX009870 | JX010007 |
| <i>C. viniferum</i>     | /        | CAUG27*     | <i>Capsicum</i> sp.               | China                    | KP145440 | KP145328 | KP145356 | KP145384 | KP145412 |
| <i>C. xanthorrhoeae</i> | /        | ICMP 17903* | <i>Xanthorrhoea preissii</i>      | Australia                | JX010261 | JX009478 | JX009653 | JX009823 | JX009927 |

---

11 reference isolates.
